# High-sensitivity calcium biosensor on the mitochondrial surface reveals that IP3R channels participate in the reticular Ca<sup>2+</sup> leak towards mitochondria.

Yves Gouriou<sup>1,2\*†</sup>, Fabrice Gonnot<sup>1,2†</sup>, Ludovic Gomez<sup>1,2</sup>, Gabriel Bidaux<sup>1,2</sup>

<sup>1</sup> Univ-Lyon CarMeN Laboratory, Inserm U1060, Université Claude Bernard Lyon 1, INRAE, Lyon 69500 Bron France.

<sup>2</sup>Hospices Civils de Lyon, Groupement Hospitalier EST, Département de Cardiologie, IHU-OPERA Bâtiment B13, Fr-69500 Bron, France.

† These authors have contributed equally to this work

## Summary

Genetically encoded biosensors based on fluorescent proteins (FPs) are widely used to monitor dynamics and sub-cellular spatial distribution of calcium ion (Ca<sup>2+</sup>) fluxes and their role in intracellular signaling pathways. The development of different mutations in the Ca<sup>2+</sup>-sensitive elements of the cameleon probes has allowed sensitive range of Ca<sup>2+</sup> measurements in almost all cellular compartments. Region of the endoplasmic reticulum (ER) tethered to mitochondria, named as the mitochondrial-associated membranes (MAMs), has received an extended attention since the last 5 years. Indeed, as MAMs are essential for calcium homeostasis and mitochondrial function, molecular tools have been developed to assess quantitatively Ca<sup>2+</sup> levels in the MAMs. However, sensitivity of the first generation Ca<sup>2+</sup> biosensors on the surface of the outer-mitochondrial membrane (OMM) do not allow to measure μM or sub-μM changes in Ca<sup>2+</sup> concentration which prevents to measure the native activity (unstimulated exogenously) of endogenous channels. In this study, we assembled a new ratiometric highly sensitive Ca<sup>2+</sup> biosensor expressed on the surface of the outer-mitochondrial membrane (OMM). It allows the detection of smaller differences than the previous biosensor in or at proximity of the MAMs. Noteworthy, we demonstrated that IP<sub>3</sub>-receptors have an endogenous activity which participate to the Ca<sup>2+</sup> leak channel on the surface of the OMM during hypoxia or when SERCA activity is blocked.

## Introduction

Initially, the cytotoxic role of calcium ions (Ca<sup>2+</sup>) in ischemia was published over 40 years ago (Schanne et al., 1979; Schlaepfer and Bunge, 1973). The Ca<sup>2+</sup> overload results from an unbalance of cell

homeostatic pathways regulating  $\text{Ca}^{2+}$  influx, efflux and release from internal stores. Release of  $\text{Ca}^{2+}$  from the endoplasmic reticulum (ER) has been suggested to be the initial signal for ER dysfunction in ischemia (Paschen and Doutheil, 1999). The alteration of  $\text{Ca}^{2+}$  ATPase pumps due to the lack of energy supply, uncovers the preexisting ER calcium leakage through different channels and receptors participating in the ischemia-induced  $\text{Ca}^{2+}$  overload (Lemos et al., 2021). In non-excitabile cells, the main  $\text{Ca}^{2+}$  release channel is the inositol 1,4,5-trisphosphate receptor (IP3Rs). IP3R channels are key elements of  $\text{Ca}^{2+}$  signaling machinery and reside in close proximity to the interface between ER and mitochondria microdomains to facilitate the transfer of  $\text{Ca}^{2+}$  ions (Gomez et al., 2016; Paillard et al., 2013; Szabadkai et al., 2006). In ischemic condition, the  $\text{Ca}^{2+}$ -sensing receptor (CaR) has been shown to be activated in different models of ischemia/reperfusion (Lu et al., 2010; Paquot et al., 2017; Yan et al., 2010). These receptors elicit phospholipase C-mediated inositol triphosphate (IP3) formation, leading to a cytosolic  $\text{Ca}^{2+}$  elevation. Yet it remains unclear if IP3Rs could participate in both ER  $\text{Ca}^{2+}$  leak and cytosolic  $\text{Ca}^{2+}$  overload, not only at the early phase of the reoxygenation (Bruno et al., 2001) but also during the hypoxic period (Szydłowska and Tymianski, 2010). Thanks to the development of new biosensors this question can now be assessed by using targeted  $\text{Ca}^{2+}$ -sensitive fluorescent proteins.

The engineering of genetically encoded fluorescent biosensors, based on green fluorescent protein (GFP) has expanded the versatility of metabolites quantification in signaling pathway networks study. Since its discovery in the 1990s (Tsien, 1998), GFP mutants have been extensively developed in a wide range of fluorescent proteins (FPs) with optimized brightness, photostability, folding and pH sensitivity. These optimizations of FPs have allowed the generation of robust tunable FRET-based biosensors to study  $\text{Ca}^{2+}$  signaling pathways. Indeed, the most common FRET biosensors are the  $\text{Ca}^{2+}$  sensitive cameleons based on CFP and YFP variants linked together by a  $\text{Ca}^{2+}$  binding domain from calmodulin and a calmodulin-binding domain from M13 skeletal-muscle myosin light-chain kinase (Palmer et al., 2006). Originally described in 2006 by Palmer et al., the Dcpv (cameleons) has been evolved into several variants: D1, D2, D3, D4 with different  $\text{Ca}^{2+}$  affinities and different cellular localization signals (Palmer et al., 2006). Cytosolic, mitochondrial and reticular cameleons  $\text{Ca}^{2+}$  biosensors have been generated and in 2010, Giacomello et al. have developed a GFP-based  $\text{Ca}^{2+}$  probe (N33D1cpv) localized on the outer mitochondrial membrane (OMM) suitable to monitor " $\text{Ca}^{2+}$  hotspots" which means high  $\text{Ca}^{2+}$  levels from  $1\mu\text{M}$  to  $200\text{-}300\mu\text{M}$  (Giacomello et al., 2010) in a limited cellular area. The targeted sequence of the biosensor was based on the first 33 amino acids of TOM20 (N33), an endogenous protein of the OMM. Currently, there is no biosensor available to measure small variations of  $\text{Ca}^{2+}$  at the mitochondrial-associated membranes (MAMs) level.

In the present study, we assembled a new mitochondrial-surface GFP-based  $\text{Ca}^{2+}$  indicator derived from the GFP-based  $\text{Ca}^{2+}$  biosensor N33D1cpv, with a higher affinity for  $\text{Ca}^{2+}$  allowing sensitive  $\text{Ca}^{2+}$  measurements at the cytosolic surface of the OMM. By means of N33D3cpv biosensor, we showed

that either genetic suppression or the pharmacological inhibition of endogenous IP3R activity reduced the speed of ER Ca<sup>2+</sup> leak on the surface of the OMM during hypoxia.

## Results and Discussion

### *Generation of a new mitochondrial-surface targeted GFP-based Ca<sup>2+</sup> indicator.*

First of all, we substituted the D1 Ca<sup>2+</sup>-binding domain of N33D1cpv (Giacomello et al., 2010) by the D3 Ca<sup>2+</sup>- binding domain of the cytosolic biosensor D3cpv, which has a higher Ca<sup>2+</sup> affinity. This new Ca<sup>2+</sup> indicator was called N33D3cpv (Figure 1A). The D3 ligand domain has a dissociation constant (Kd) of 0.6μM that is particularly adapted to the range of low intensity Ca<sup>2+</sup> variations in the cytosol (range of Ca<sup>2+</sup> changes from 0.1μM to 10μM). By means of confocal imaging analysis, we validated the N33D3cpv localization around the outer-mitochondrial membrane (OMM) as described for N33D1cpv indicator (Giacomello et al., 2010). Cells transfected with N33D3cpv indicator together with a mitochondrial staining (mitotracker deep-red) showed a donut-like N33D3cpv fluorescence while mitotracker deep-red labelled the interior of mitochondria (Figure 1B, left panel). Confocal images using ERtracker red showed also that the probe is not only facing the ER (Figure 1B, right panel). Finally, we took advantage of the original protocol published by Palmer A. and Tsien R. (Palmer and Tsien, 2006), to perform an *in situ* calibration in order to compare with N33D1cpv the two key parameters, Ca<sup>2+</sup> concentration and the dynamic range, for the N33D3cpv indicator (Figure 1C). We found a Kd of 1,5μM for N33D3cpv with the Ca<sup>2+</sup> titration curve (Figure 1C) whereas N33D1cpv was reported having two Kd at: 18,61μM and 135,41μM (Giacomello et al., 2010). We also measured for each set of experiments the dynamic range for each probe. Briefly, Ca<sup>2+</sup>-buffered and Ca<sup>2+</sup>-saturated solutions were applied on permeabilized H9c2 rat cardiomyoblast cells, and variation of [Ca<sup>2+</sup>] outside OMM ([Ca<sup>2+</sup>]<sub>OMM</sub>) was measured after IP3-mediated Ca<sup>2+</sup> release by ATP stimulation (Figure 1D). We observed that the variation of FRET ratio, triggered by ATP stimulation, was 6-fold greater in N33D3cpv compared to the original N33D1cpv. This confirms the higher sensitivity of N33D3cpv indicator for physiological Ca<sup>2+</sup> fluxes on the surface of the OMM.

Figure 1: Characterization of N33D3cpv

A Schematic representation of the cloning strategy

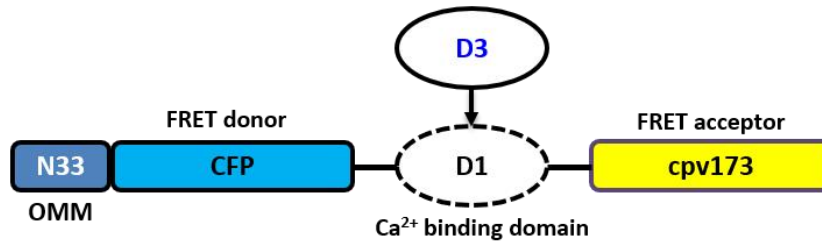

B N33D3cpv localization

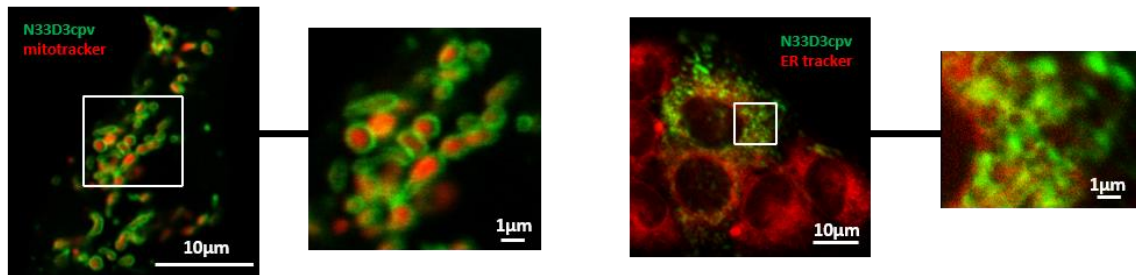

C *In situ* Ca<sup>2+</sup> titration of N33D3cpv

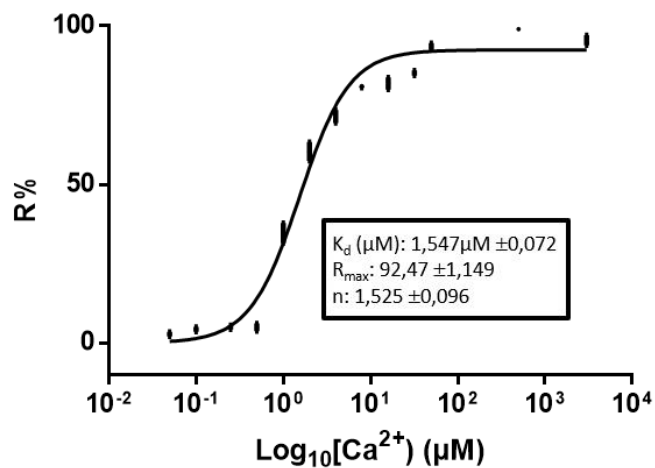

D Ca<sup>2+</sup> calibration R<sub>min</sub>/R<sub>max</sub> of N33D1cpv/N33D3cpv

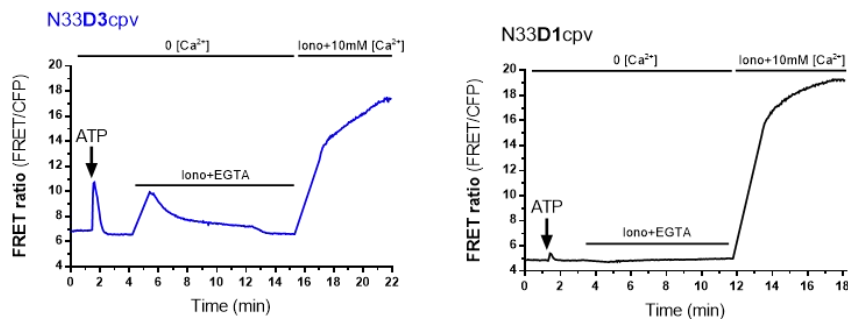

**Figure 1. Characterization of N33D3cpv.** (A) Schematic representation of the cloning strategy. Original Ca<sup>2+</sup> biosensor N33D1cpv is composed of a signal addressing sequence (N33) coding

for an outer mitochondrial membrane (OMM) peptide, the FRET donor (CFP: Cyan Fluorescent Protein), the  $\text{Ca}^{2+}$ -binding domain D1 and the FRET acceptor (cpv173: circularly permuted venus protein). N33D3cpv was generated by replacing D1  $\text{Ca}^{2+}$ -binding domain with the D3 domain. **(B)** (left panel) Confocal images of H9c2 cell expressing N33D3cpv biosensor (green) and stained with a mitochondrial marker (mitotracker deep red). (right panel) Confocal images of H9c2 cell expressing N33D3cpv biosensor (green) and stained with an ER marker (ER tracker red). Zoomed-in panels for each confocal image are represented on the original image by a white square **(C)** *In situ*  $\text{Ca}^{2+}$  titration assay of N33D3cpv with the fit values shown in the box. Data plotted: mean  $\pm$  SEM ( $n \geq 9$ ) cells for each  $[\text{Ca}^{2+}]$ . **(D)** Representative kinetics of FRET ratio (FRET/CFP) of H9C2 cells stimulated with  $100\mu\text{M}$  ATP in  $\text{Ca}^{2+}$  free extracellular medium then permeabilized with ionomycin ( $5\mu\text{M}$ ) in an intracellular medium containing EGTA ( $600\mu\text{M}$ ) and BAPTA-AM ( $5\mu\text{M}$ ) then finally perfused with an intracellular medium containing  $\text{CaCl}_2$  ( $10\text{mM}$ ). (Left panel) N33D3cpv. (Right panel) N33D1cpv. Raw values of FRET ratio are presented (FRET canal/CFP).

### ***Ca<sup>2+</sup> affinity of the new generated N33D3cpv indicator.***

A better sensitivity to  $\text{Ca}^{2+}$  must enable the detection of low  $\text{Ca}^{2+}$  levels but it should also modify the kinetics of detection. To confirm this point, we used three different  $\text{Ca}^{2+}$ -mobilizing stimuli and compared the responses measured by N33D1cpv and N33D3cpv indicators. We have chosen fast, slow and long-lasting kinetics of  $\text{Ca}^{2+}$  release on the surface of the OMM induced by ATP or oxygen glucose deprivation (OGD), respectively without external  $\text{Ca}^{2+}$ . We also used cyclopiazonic acid (CPA) to block SERCA pump activity in order to visualize the slow ER  $\text{Ca}^{2+}$  leakage. To compare both indicators' sensitivities and dynamics, we plotted them on the same graph by normalizing the FRET-ratio (F) with the baseline FRET-ratio value ( $F_0$ ). At first, we compared the amplitude of the  $\text{Ca}^{2+}$  response following an ATP stimulus and we observed that the peak of averaged  $F/F_0$  ratio was greater with N33D3cpv than with N33D1cpv: 1.573 and 1.107, respectively (Figure 2A). Second, we stimulated with CPA, a SERCA pump blocker that uncovers the slow passive  $\text{Ca}^{2+}$  leakage from the endoplasmic reticulum (ER). The peak of averaged  $F/F_0$  ratio was greater with N33D3cpv than with N33D1cpv, 1.426 and 1.123 respectively and we observed also a difference in the decay of  $\text{Ca}^{2+}$  level (Figure 2B). Third, we performed an OGD to compare the indicators' responses and we observed that the peak of averaged  $F/F_0$  ratio was once again greater with N33D3cpv than with N33D1cpv, 1.439 and 1.131 respectively (Figure 2C). As expected, due to its higher  $K_d$  for  $\text{Ca}^{2+}$  ( $K_d$ s at  $18,61\mu\text{M}$  and  $135,41\mu\text{M}$ ), N33D1cpv biosensor was not sensitive enough to efficiently discriminate the variations in  $[\text{Ca}^{2+}]_{\text{OMM}}$  in these three conditions (Figure 2D). Indeed, after calibration,  $[\text{Ca}^{2+}]_{\text{OMM}}$  estimated with N33D1cpv biosensor, in resting or stimulated (ATP, CPA or OGD) H9c2 rat cardiomyoblasts, showed a lot of negative values that reported a measure below the dynamic range of the biosensor (Figure 2D,  $\Delta R\%$  between 0,2-6) . Conversely, N33D3cpv allowed us to perform accurate and reproducible measurements of  $[\text{Ca}^{2+}]_{\text{OMM}}$  of  $0.142\pm 0.108\mu\text{M}$ ,  $0,442\pm 0.164\mu\text{M}$ ,  $0.426\pm 0.082\mu\text{M}$ ,  $0.434\pm 0.051\mu\text{M}$ ,  $0,2521\pm 0.080\mu\text{M}$  and  $0.474\pm 0.040\mu\text{M}$  in

basal, 50 $\mu$ M ATP, 100 $\mu$ M ATP, 5 $\mu$ M CPA, 20 $\mu$ M CPA and OGD conditions, respectively (Supplemental Figure E and Figure 2E,  $\Delta R\%$  between 17-40). Altogether, these results clearly demonstrate the enhanced sensitivity of the new N33D3cpv sensor and its ability to detect lower variations in  $[Ca^{2+}]_{OMM}$ .

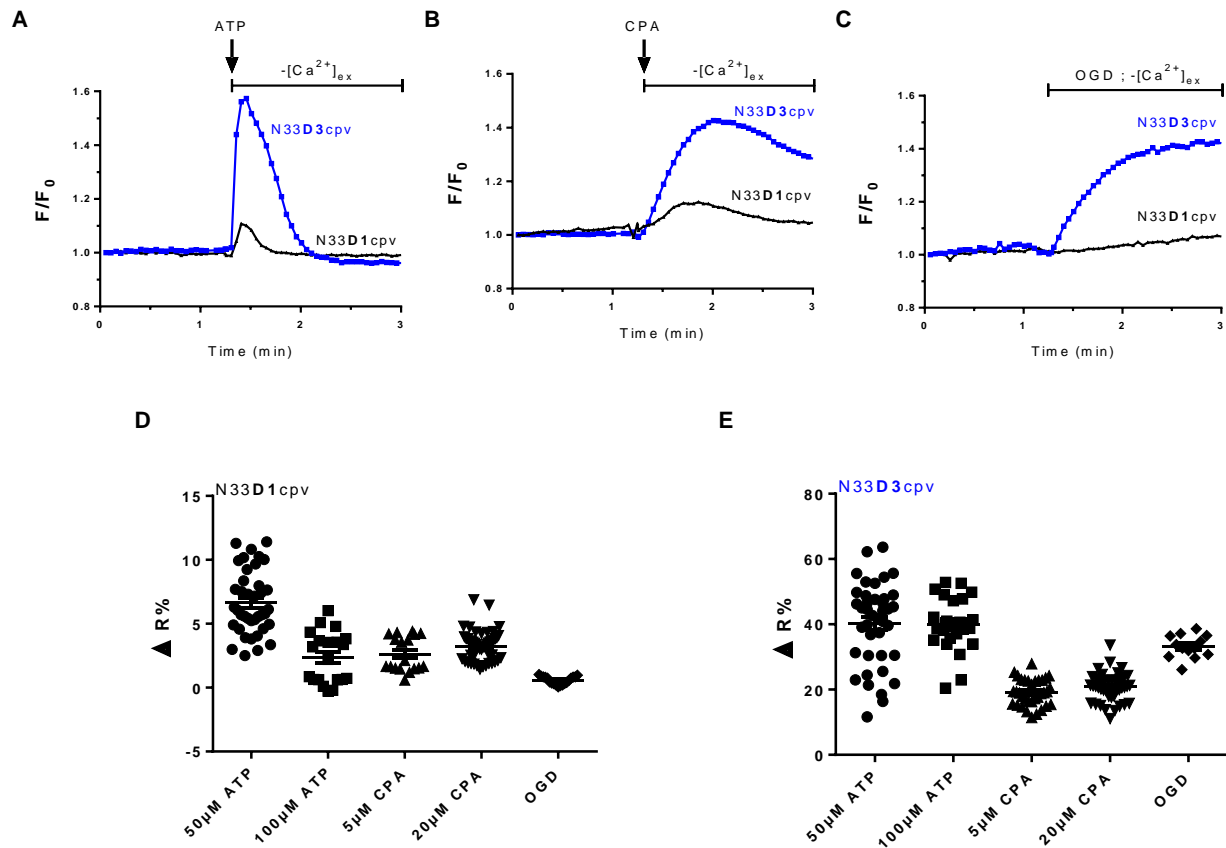

**Figure 2. Sensitivity of N33D1cpv and N33D3cpv biosensors in OMM.** (A) Change in  $[Ca^{2+}]_{OMM}$  induced by a 100  $\mu$ M ATP stimulation, using either N33D1cpv (black) or N33D3cpv (blue) in absence of external  $Ca^{2+}$ . (B) Changes in  $[Ca^{2+}]_{OMM}$  induced by 5  $\mu$ M cyclopiazonic acid (CPA) stimulation, using N33D1cpv (black) or N33D3cpv (blue) in absence of external  $Ca^{2+}$ . (C) Changes in  $[Ca^{2+}]_{OMM}$  occurring during an oxygen glucose deprivation (OGD), using N33D1cpv (black) or N33D3cpv (blue) in absence of external  $Ca^{2+}$ . (A-C) Representative average FRET-ratio (F) normalized with the baseline FRET-ratio value ( $F_0$ ). (D-E) Dot plots represent the mean  $\pm$ SEM of  $\Delta R\%$  of the 2 probes (N33D1cpv and N33D3cpv, respectively), where  $\Delta R\%$  is calculated as % of the steady-state value ( $R_1$ ) and its maximum value ( $R_2$ ) after drugs stimulation (ATP, CPA) or OGD. N=3-4, Figure 2D n=39, 20, 18, 48, 19 and Figure 2E n=40, 25, 34, 45, 13 respectively.

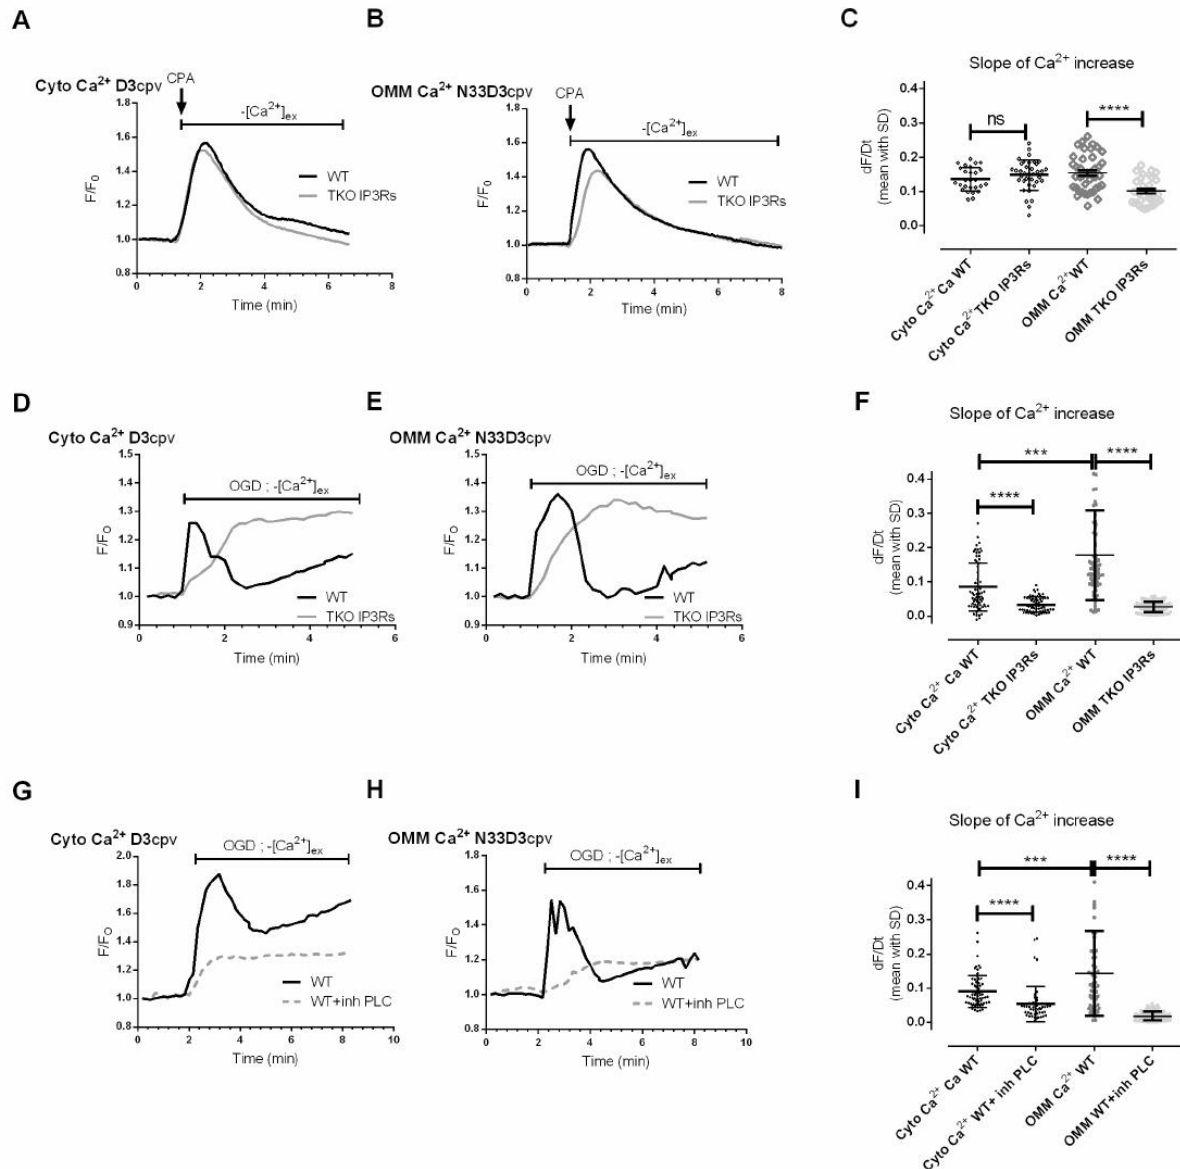

**Figure 3. N33D3cpv Ca<sup>2+</sup> biosensor study the role of IP3R channels in the passive ER Ca<sup>2+</sup> leak.** Time trace shows [Ca<sup>2+</sup>]<sub>cyto</sub> (A) or [Ca<sup>2+</sup>]<sub>OMM</sub> (B) measured with D3cpv and N33D3cpv, respectively, in absence of external Ca<sup>2+</sup>, in WT (black) and TKO IP3Rs (grey) HeLa cells. A 5 μM cyclopiazonic acid (CPA) stimulation was applied to block SERCA activity in order to reveal the ER Ca<sup>2+</sup> leak. Representative average FRET-ratio (F) normalized with the baseline FRET-ratio value (F<sub>0</sub>). (C) Slope of the Ca<sup>2+</sup> increase induced by cyclopiazonic acid (CPA) stimulation in WT and TKO IP3Rs HeLa cells N=3-4 n=27, 37, 42, 32 respectively. Time trace shows [Ca<sup>2+</sup>]<sub>cyto</sub> (D) or [Ca<sup>2+</sup>]<sub>OMM</sub> (E) measured with D3cpv and N33D3cpv, respectively, in absence of external Ca<sup>2+</sup>, in WT (black) and TKO IP3Rs (grey) HeLa cells. These cells were subjected to an oxygen glucose deprivation (OGD). Representative average FRET-ratio (F) normalized with the baseline FRET-ratio value (F<sub>0</sub>). (F) Slope of the Ca<sup>2+</sup> increase induced by OGD in WT and TKO IP3Rs HeLa cells. N=3 n=67, 64, 75, 83, respectively. Time trace shows [Ca<sup>2+</sup>]<sub>cyto</sub> (G) or [Ca<sup>2+</sup>]<sub>OMM</sub> (H) measured with D3cpv and N33D3cpv,

respectively, in absence of external  $\text{Ca}^{2+}$ , in WT (black) and TKO IP3Rs (grey) HeLa cells. HeLa cells expressing D3cpv or N33D3cpv were treated with  $10\mu\text{M}$  U73122 during an oxygen glucose deprivation (OGD). (I) Slope of the  $\text{Ca}^{2+}$  increase induced by OGD in WT HeLa cells with or without PLC inhibitor ( $10\mu\text{M}$  U73122).  $N=3$   $n=65, 50, 57, 84$ , respectively. Representative average FRET-ratio (F) normalized with the baseline FRET-ratio value ( $F_0$ ). (C, F, I) Data shown represent the mean with standard deviation (SD) of at least 3-4 independent experiments (ns  $p \geq 0.05$ , \*  $p < 0.05$ , \*\*  $p < 0.01$ , \*\*\*  $p < 0.001$ , \*\*\*\*  $p < 0.0001$ ).

### ***Physiological application of the newly generated N33D3cpv $\text{Ca}^{2+}$ indicator.***

In ischemic condition, the lack of energy supply ceases  $\text{Ca}^{2+}$  ATPase pumps and depletes ER  $\text{Ca}^{2+}$  stores. Indeed, we previously demonstrated the rapid decrease of cytosolic and mitochondrial ATP levels upon ischemia. This decrease was concomitant with a rapid release of  $\text{Ca}^{2+}$  in the cytosol and in the mitochondria (Gouriou et al., 2020). Nevertheless, this mechanism of ER  $\text{Ca}^{2+}$  depletion remains unclear. Despite the fact that IP3Rs are the major release  $\text{Ca}^{2+}$  channels in non-excitabile cells, their contribution during the ischemic period has not been assessed. We used a model of types-I/II/III IP3Rs triple knock-out (TKO) (Ando et al., 2018) to study their contribution in hypoxia-induced  $\text{Ca}^{2+}$  leak by using our new N33D3cpv indicator.

First, we controlled the TKO IP3Rs HeLa cells model. Immunoblotting against IP3R1 isoform allowed us to show that, unlike the WT samples, no band at the expected size of about 314kDa was detected in the TKO samples (Supplemental Figure A). A functional assay was done through the measurement of the  $\text{Ca}^{2+}$  levels using N33D3cpv indicator on stimulated HeLa cells with ATP. We observed an IP3-mediated  $\text{Ca}^{2+}$  release in WT cells and no response in TKO cells (Supplemental Figure B). We thus confirmed the absence of IP3Rs activity in this model of TKO HeLa cells.

With the objective to assess the implication of IP3Rs in ER  $\text{Ca}^{2+}$  leak, we assessed the native activity of IP3R while blocking SERCA activity with CPA. We compared the  $\text{Ca}^{2+}$  responses induced by CPA in WT and TKO HeLa cells with D3cpv (Figure 3A) and N33D3cpv indicators (Figure 3B). As reported in figure 3, D3cpv was unable to detect any difference in the cytosol whereas N33D3cpv biosensor detected a significant decrease in the slope of  $\text{Ca}^{2+}$  accumulation around mitochondria in TKO IP3Rs ( $0.101 \pm 0.038$ ) as compared to WT HeLa cells ( $0.154 \pm 0.052$ ). Although these results may seem paradoxical, they are in the same line of evidence with prior studies which could not report difference in  $[\text{Ca}^{2+}]_{\text{cyto}}$  after blockage of SERCA pumps in TKO and WT cells; whatever the biosensor used: Fura-2 ( $K_d$   $0.220\mu\text{M}$ ) (Ando et al., 2018), GEM-GECO ( $K_d$   $0.340\mu\text{M}$ ) (Yue et al., 2020). These prior publications mostly supported the fact that TKO had no change in their ER  $\text{Ca}^{2+}$  stores. Interestingly, by means of GEM-CEPIA1er ( $K_d$   $558\mu\text{M}$ ) or R-CEPIA1er ( $K_d$   $565\mu\text{M}$ ) (Yue et al., 2020), Yue et al reported a small decrease in the rate of ER  $\text{Ca}^{2+}$  release, what could be explained by the decrease in ER  $\text{Ca}^{2+}$  leak, that we observed on the surface of the OMM (Fig. 3C). IP3R1 has been previously reported



to exert an endogenous activity as leak channel in non-stimulated cells (Bandara et al., 2013; Kasri et al., 2006). The  $\text{Ca}^{2+}$  decrease that we observed on the surface of the OMM could thus be related to the loss of native IP3R activity or an increased  $\text{Ca}^{2+}$  removal by pumps or transporters (so as MCU in mitochondria). The latter hypothesis is very unlikely since SERCA pumps are inhibited by CPA in our experiments. In addition, Yue et al additionally reported a decrease in SERCA-mediated  $\text{Ca}^{2+}$  uptake in TKO cells that would have been expected to enhance  $\text{Ca}^{2+}$  accumulation on the surface of the OMM. Finally, the increase in MAMs width, previously reported in the TKO cells (Bartok et al., 2019), is expected to decrease MCU-mediated  $\text{Ca}^{2+}$  uptake in mitochondria, that would have also led to an increase in  $\text{Ca}^{2+}$  accumulation on the surface of the OMM. Altogether these results rather validate the hypothesis that endogenous IP3R activity participates in the ER  $\text{Ca}^{2+}$  leak when SERCA activity is pharmacologically inhibited.

We thus wondered whether the native activity of IP3Rs contributed to the ER  $\text{Ca}^{2+}$  leak during hypoxia. When HeLa cells were incubated under oxygen glucose deprivation (OGD), an ER  $\text{Ca}^{2+}$  leak occurred which could be measured indirectly through the sustained  $\text{Ca}^{2+}$  increase both in the cytosol,  $[\text{Ca}^{2+}]_{\text{cyto}}$  (Figure 3D) and in OMM surface,  $[\text{Ca}^{2+}]_{\text{OMM}}$  (Figure 3E). In the supplemental figures C&D, we reported that the precision of the measurements of steady-state  $[\text{Ca}^{2+}]$  by D3cpv (SD: 0.097 and 0.102 for WT and TKO; Supp Fig. C) was 2-fold below the one of N33D3cpv (SD: 0.053 and 0.055 for WT and TKO; Supp Fig. D). Consequently, N33D3cpv could detect a smaller variation in  $[\text{Ca}^{2+}]$  in WT than in TKO HeLa cells, at  $0.098 \pm 0.064 \mu\text{M}$  and  $0.120 \pm 0.068 \mu\text{M}$ , respectively (Supp Fig. C&D). We then analyzed the slope of the rise in  $[\text{Ca}^{2+}]_{\text{cyto}}$  and in  $[\text{Ca}^{2+}]_{\text{OMM}}$  and we found a significantly slower  $\text{Ca}^{2+}$  increase rate in TKO compared to WT HeLa cells both in the cytosol and on the OMM (Figure 3F). Interestingly, we detected a faster  $\text{Ca}^{2+}$  increase at the OMM level compared to the cytosol in WT cells but no difference in TKO cells. This result suggests a greater activity of IP3R on the surface of the OMM than in the whole ER membrane (Bartok et al., 2019). However, IP3R clusters participate as physical tethers in MAMs and the loss of IP3Rs has been reported to decrease the frequency of tight contact sites (10-50nm) in MAMs of TKO cells. This modification in MAMs structure could in turn delay the rise of  $\text{Ca}^{2+}$  on the surface of the OMM. In order to determine to which extent (i) the loss of IP3Rs activity and (ii) the modification in ER-mitochondrial contacts were involved in the observed decrease in the rate of  $\text{Ca}^{2+}$  accumulation on the surface of the OMMs during the hypoxia, we incubated WT HeLa cells with U73122 to inhibit phospholipase C (PLC), which has a crucial role in the initiation of the activation of IP3Rs (Berridge, 1987). WT HeLa cells were incubated with  $10 \mu\text{M}$  U73122 (Figure 3G, 3H) and we detected a reduced rate of  $\text{Ca}^{2+}$  increase in the cytosol and in OMM surface in WT+ PLC inhibitor compared to WT HeLa (Figure 3I). Altogether, these results confirmed that an endogenous IP3R activity participated in the passive ER  $\text{Ca}^{2+}$  leak occurring during hypoxia and was more specifically localized in the MAMs.

In conclusion, thanks to our newly designed D3cpv biosensor addressed to OMM, we showed that the endogenous IP3R activity participates in ER Ca<sup>2+</sup> leak during hypoxia. This N33D3cpv biosensor allows very sensitive Ca<sup>2+</sup> measurement on the surface of mitochondria and will help further researches in the field of ER-mitochondria homeostasis.

## Material and Methods

***N33D3cpv construct strategy:*** A 1998 bp BamHI-XhoI fragment encompassing D3cpv was prepared from pcDNA-D3cpv, gifted from Roger Tsien (Addgene plasmid # 36323)(Palmer et al., 2006), and subcloned between BamHI and XhoI restriction sites in pcDNA-N33D1cpv, gifted from Tullio Pozzan(Giacomello et al., 2010), to generate pcDNA-N33D3cpv (7583 bp). Created plasmid DNA sequence was confirmed by Sanger sequencing.

***Cell culture and transfection:*** Rat cardiomyoblasts H9c2 (ATCC, CRL-1446) and WT / TKO -HeLa cells (kindly provided by Katsuhiko Mikoshiba at SIAIS, ShanghaiTech University, Shanghai, China) were routinely cultured in Dulbecco's Modified Eagle Medium (Gibco) supplemented with 10% fetal calf serum (PAN-biotech), 100 U/mL penicillin (Gibco), 100 µg/mL streptomycin (Gibco), 2 mM L-glutamine (Gibco) and incubated at 37°C in 5% CO<sub>2</sub> in a damp atmosphere. Cells were regularly passaged by single-cell dissociation with 0.05% trypsin-EDTA (Gibco). For generation of transient transfectants, all DNAs (N33D1cpv and N33D3cpv) were transfected into cells using DharmaFECT Duo (Dharmacon, T-2010-03) according to manufacturer's instructions. Cells were plated on glass coverslips 24 hours before transfection and experiments were performed 48 hours after.

***Immunoblotting:*** For Western-blotting, cell lysates were obtained by treating the cell monolayer with RIPA buffer complemented with protease and phosphatase inhibitors. Protein lysates were then cleared by centrifugation (17'000g for 20min). Total protein concentration was determined using bicinchoninic acid protein assay (Interchim, UP40840) and 25µg of denatured and reduced proteins of each sample was loaded on a 6% SDS-PAGE. After SDS-PAGE migration and electroblotting on polyvinylidene fluoride, the membranes were blocked with 5% non-fat milk and then incubated with the specific primary antibodies [rabbit anti-IP3R1 (Santa-Cruz, sc-28614; 1/500) and rabbit anti-TUBULIN (Santa-Cruz, sc-5286; 1/500)]. Blots were incubated with horseradish peroxidase (HRP)-coupled sheep anti-mouse IgG (GE Healthcare, NA931VS; 1/10000) and (HRP)-coupled goat anti-rabbit IgG (GE Healthcare, NA934VS; 1/10000), and developed with Clarity Western ECL Substrate (BioRad, 1705060). The band intensity was determined using Image Lab software (Bio-Rad).

***Wide-field imaging:*** Living cells were imaged on an inverted epifluorescence microscope Leica DMi6000B using a 40x oil-immersion objective, with Lambda DG4 wavelength-switch xenon light source (Sutter Instruments), equipped with an ORCA-Flash4.0 digital CMOS camera C11440 (Hamamatsu). Pictures have been acquired with 200 ms acquisition time per frame, 10% fluorescence

intensity manager (FIM) and an interval of 1 second for time-lapse. Cameleon fluorescent proteins were excited at a wavelength of 430nm and emissions were collected at 480nm and 530nm. Fluorescence ratio imaging was analysed using MetaFluor software (Molecular Devices). Experiments were carried out in controlled environment at 37°C and cells were placed in Ca<sup>2+</sup>-free buffer containing 140mM NaCl, 5mM KCl, 1mM MgCl<sub>2</sub>, 10mM HEPES and 10 mM Glucose, adjusted to pH 7.4, supplemented with 1 mM EGTA.

Dynamic range method: In H9C2 cells expressing N33D3cpv or N33D1cpv, R<sub>min</sub> and R<sub>max</sub> were obtained upon permeabilization of the cells with 5μM ionomycin and a Ca<sup>2+</sup>-free buffer containing 140mM NaCl, 5mM KCl, 1mM MgCl<sub>2</sub>, 10mM HEPES and 10 mM Glucose, adjusted to pH 7.4, supplemented with 600μM EGTA. The R<sub>min</sub> was achieved by perfusing the cells with this medium containing 600μM EGTA and 5μM BAPTA-AM. The R<sub>max</sub> was achieved by perfusing the cells with a Ca<sup>2+</sup> buffer containing 140mM NaCl, 5mM KCl, 1mM MgCl<sub>2</sub>, 10mM HEPES and 10 mM Glucose, adjusted to pH 7.4, supplemented with 10mM CaCl<sub>2</sub>. R% is calculated as  $R\% = (R - R_{\min}) / (R_{\max} - R_{\min}) \times 100$ .

In situ Ca<sup>2+</sup> titration assay: H9C2 cells expressing N33D3cpv were permeabilized with 100μM digitonin in a Ca<sup>2+</sup>-free medium containing 600μM EGTA for 60 sec and then washed 3 times with the same medium without digitonin. Cells were then perfused with Ca<sup>2+</sup> buffer containing 140mM NaCl, 5mM KCl, 1mM MgCl<sub>2</sub>, 10mM HEPES and 10 mM Glucose, adjusted to pH 7.4, and known Ca<sup>2+</sup> concentrations. At the end of each experiment, a saturating Ca<sup>2+</sup> concentration (10mM) was applied. For [Ca<sup>2+</sup>] lower than 0,5μM, the buffer was supplied with BAPTA free acid and Ca<sup>2+</sup>. The free [Ca<sup>2+</sup>] was estimated using MaxChelator. The results obtained were plotted as log<sub>10</sub>[Ca<sup>2+</sup>] (x-axis) and R% (y-axis) and fitted using Prism 9.0 (GraphPad) with the following equation:  $y = (R_{\max 1} \times x^{n1}) / (kd1^{n1} + x^{n1}) + (R_{\max 2} \times x^{n2}) / (kd2^{n2} + x^{n2})$ .

**Oxygen-Glucose Deprivation (OGD) experiments:** Cells were washed twice, placed in Ca<sup>2+</sup>-containing buffer having 140mM NaCl, 5mM KCl, 1mM MgCl<sub>2</sub>, 10 mM HEPES and 2mM Na<sub>2</sub>S<sub>2</sub>O<sub>4</sub>, adjusted to pH 7.4, supplemented with 2mM CaCl<sub>2</sub>. Cells were placed in a specifically manufactured bio-incubator (NewBrunswick, Galaxy 48R) connected with a 100% N<sub>2</sub> bottle. Oxygen level and temperature were monitored at 0.5% and at 37°C respectively. An Okolab system with a specific hypoxic chamber was used to control the environmental constants (temperature, humidity and oxygen levels).

**Confocal imaging:** Living cells were imaged on an inverted confocal microscope Nikon A1R+ system using 40x oil-immersion objective with Argon laser (488-514nm) for the Cameleon excitation, Diode (642nm) for the Mitotracker Deep Red and diode (560nm) for the ERtracker Red. The images were acquired on living cells plated on glass coverslips.

**Statistical analysis:** Data processing and statistical analyses were conducted with Prism 9.0 (GraphPad) software. Before proceeding to any analysis, the normality of the samples was evaluated. Unpaired *t*-test (for normal distribution) or Mann–Whitney test (for non-normal distribution) was used unless stated otherwise in the figure legends. *p*-values are indicated in figures. Data show mean with standard deviations (SD) calculated from at least three independent experiments. For single-cell imaging analysis, statistics were performed on *n* = number of cells to assess single-cell effect as well as heterogeneity between them. Both *N* and *n* values are indicated in the figure legends. A *p* value < 0.05 was considered significant.

**Acknowledgments:** We would like to thank Roger Tsien for the D3cpv construct (University of California, San Diego, CA) and Marta Giacomelo, Paola Pizzo and Tullio Pozzan for the N33D1cpv construct (Department of Biomedical Sciences, University of Padova, Italy). HeLa WT and TKO IP3Rs cells were a gift from Katsuhiko Mikoshiba, SIAIS, ShanghaiTech University, Shanghai, China. We address a special thanks to Mélanie Paillard and Mariam Wehbi for proofreading the manuscript.

**Funding:** This work was supported by a grant from the Leducq Transatlantic Network of Excellence “Targeting Mitochondria to Treat Heart Disease ‘MitoCardia’ (16 CVD 04) and by Cardiocare (ANR n°16-CE17-0020-01) of the French National Research Agency (ANR).

**Conflicts of Interest:** The authors declare no competing interests.

Ando, H., Hirose, M., and Mikoshiba, K. (2018). Aberrant IP3 receptor activities revealed by comprehensive analysis of pathological mutations causing spinocerebellar ataxia 29. *Proceedings of the National Academy of Sciences of the United States of America* *115*, 12259-12264.

Bandara, S., Malmersjo, S., and Meyer, T. (2013). Regulators of calcium homeostasis identified by inference of kinetic model parameters from live single cells perturbed by siRNA. *Science signaling* *6*, ra56.

Bartok, A., Weaver, D., Golenar, T., Nichtova, Z., Katona, M., Bansaghi, S., Alzayady, K.J., Thomas, V.K., Ando, H., Mikoshiba, K., *et al.* (2019). IP3 receptor isoforms differently regulate ER-mitochondrial contacts and local calcium transfer. *Nature communications* *10*, 3726.

Berridge, M.J. (1987). Inositol trisphosphate and diacylglycerol: two interacting second messengers. *Annual review of biochemistry* *56*, 159-193.

Bruno, V., Battaglia, G., Copani, A., D'Onofrio, M., Di Iorio, P., De Blasi, A., Melchiorri, D., Flor, P.J., and Nicoletti, F. (2001). Metabotropic glutamate receptor subtypes as targets for neuroprotective drugs. *Journal of cerebral blood flow and metabolism : official journal of the International Society of Cerebral Blood Flow and Metabolism* *21*, 1013-1033.

Giacomello, M., Drago, I., Bortolozzi, M., Scorzeto, M., Gianelle, A., Pizzo, P., and Pozzan, T. (2010). Ca<sup>2+</sup> hot spots on the mitochondrial surface are generated by Ca<sup>2+</sup> mobilization from stores, but not by activation of store-operated Ca<sup>2+</sup> channels. *Molecular cell* *38*, 280-290.

Gomez, L., Thiebaut, P.A., Paillard, M., Ducreux, S., Abrial, M., Crola Da Silva, C., Durand, A., Alam, M.R., Van Coppenolle, F., Sheu, S.S., *et al.* (2016). The SR/ER-mitochondria calcium crosstalk is regulated by GSK3beta during reperfusion injury. *Cell death and differentiation* *23*, 313-322.

- Gouriou, Y., Alam, M.R., Harhous, Z., Crola Da Silva, C., Baetz, D.B., Badawi, S., Lefai, E., Rieusset, J., Durand, A., Harisseh, R., *et al.* (2020). ANT2-Mediated ATP Import into Mitochondria Protects against Hypoxia Lethal Injury. *Cells* *9*.
- Kasri, N.N., Kocks, S.L., Verbert, L., Hebert, S.S., Callewaert, G., Parys, J.B., Missiaen, L., and De Smedt, H. (2006). Up-regulation of inositol 1,4,5-trisphosphate receptor type 1 is responsible for a decreased endoplasmic-reticulum Ca<sup>2+</sup> content in presenilin double knock-out cells. *Cell calcium* *40*, 41-51.
- Lemos, F.O., Bultynck, G., and Parys, J.B. (2021). A comprehensive overview of the complex world of the endo- and sarcoplasmic reticulum Ca(2+)-leak channels. *Biochimica et biophysica acta. Molecular cell research* *1868*, 119020.
- Lu, F., Tian, Z., Zhang, W., Zhao, Y., Bai, S., Ren, H., Chen, H., Yu, X., Wang, J., Wang, L., *et al.* (2010). Calcium-sensing receptors induce apoptosis in rat cardiomyocytes via the endo(sarco)plasmic reticulum pathway during hypoxia/reoxygenation. *Basic & clinical pharmacology & toxicology* *106*, 396-405.
- Paillard, M., Tubbs, E., Thiebaut, P.A., Gomez, L., Fauconnier, J., Da Silva, C.C., Teixeira, G., Mewton, N., Belaidi, E., Durand, A., *et al.* (2013). Depressing mitochondria-reticulum interactions protects cardiomyocytes from lethal hypoxia-reoxygenation injury. *Circulation* *128*, 1555-1565.
- Palmer, A.E., Giacomello, M., Kortemme, T., Hires, S.A., Lev-Ram, V., Baker, D., and Tsien, R.Y. (2006). Ca<sup>2+</sup> indicators based on computationally redesigned calmodulin-peptide pairs. *Chemistry & biology* *13*, 521-530.
- Palmer, A.E., and Tsien, R.Y. (2006). Measuring calcium signaling using genetically targetable fluorescent indicators. *Nature protocols* *1*, 1057-1065.
- Paquot, F., Huart, J., Defraigne, J.O., Krzesinski, J.M., and Jouret, F. (2017). Implications of the calcium-sensing receptor in ischemia/reperfusion. *Acta cardiologica* *72*, 125-131.
- Paschen, W., and Doutheil, J. (1999). Disturbances of the functioning of endoplasmic reticulum: a key mechanism underlying neuronal cell injury? *Journal of cerebral blood flow and metabolism : official journal of the International Society of Cerebral Blood Flow and Metabolism* *19*, 1-18.
- Schanne, F.A., Kane, A.B., Young, E.E., and Farber, J.L. (1979). Calcium dependence of toxic cell death: a final common pathway. *Science* *206*, 700-702.
- Schlaepfer, W.W., and Bunge, R.P. (1973). Effects of calcium ion concentration on the degeneration of amputated axons in tissue culture. *The Journal of cell biology* *59*, 456-470.
- Szabadkai, G., Bianchi, K., Varnai, P., De Stefani, D., Wieckowski, M.R., Cavagna, D., Nagy, A.I., Balla, T., and Rizzuto, R. (2006). Chaperone-mediated coupling of endoplasmic reticulum and mitochondrial Ca<sup>2+</sup> channels. *The Journal of cell biology* *175*, 901-911.
- Szidlowska, K., and Tymianski, M. (2010). Calcium, ischemia and excitotoxicity. *Cell calcium* *47*, 122-129.
- Tsien, R.Y. (1998). The green fluorescent protein. *Annual review of biochemistry* *67*, 509-544.
- Yan, L., Zhu, T., Sun, T., Wang, L., Pan, S., Tao, Z., Yang, Z., and Cao, K. (2010). Activation of calcium-sensing receptors is associated with apoptosis in a model of simulated cardiomyocytes ischemia/reperfusion. *Journal of biomedical research* *24*, 301-307.
- Yue, L., Wang, L., Du, Y., Zhang, W., Hamada, K., Matsumoto, Y., Jin, X., Zhou, Y., Mikoshiba, K., Gill, D.L., *et al.* (2020). Type 3 Inositol 1,4,5-Trisphosphate Receptor is a Crucial Regulator of Calcium Dynamics Mediated by Endoplasmic Reticulum in HEK Cells. *Cells* *9*.
